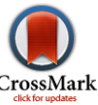

## Correction

# Correction: Opposing Regulation of PROX1 by Interleukin-3 Receptor and NOTCH Directs Differential Host Cell Fate Reprogramming by Kaposi Sarcoma Herpes Virus

**The *PLOS Pathogens* Staff**

The authors would like to correct an error in panel A of Figure 1. Some of the western blot panels depicted in Figure 1A were switched with those in Figure 1B during assembly of the final figure. The authors have replaced the Western blots in Figure 1A with a set of panels from an independent experiment ran under the same conditions. Please see the corrected version of Figure 1 here.

---

**Citation:** The *PLOS Pathogens* Staff (2014) Correction: Opposing Regulation of PROX1 by Interleukin-3 Receptor and NOTCH Directs Differential Host Cell Fate Reprogramming by Kaposi Sarcoma Herpes Virus. *PLoS Pathog* 10(11): e1004544. doi:10.1371/journal.ppat.1004544

**Published** November 6, 2014

**Copyright:** © 2014 The *PLOS Pathogens* Staff. This is an open-access article distributed under the terms of the Creative Commons Attribution License, which permits unrestricted use, distribution, and reproduction in any medium, provided the original author and source are credited.

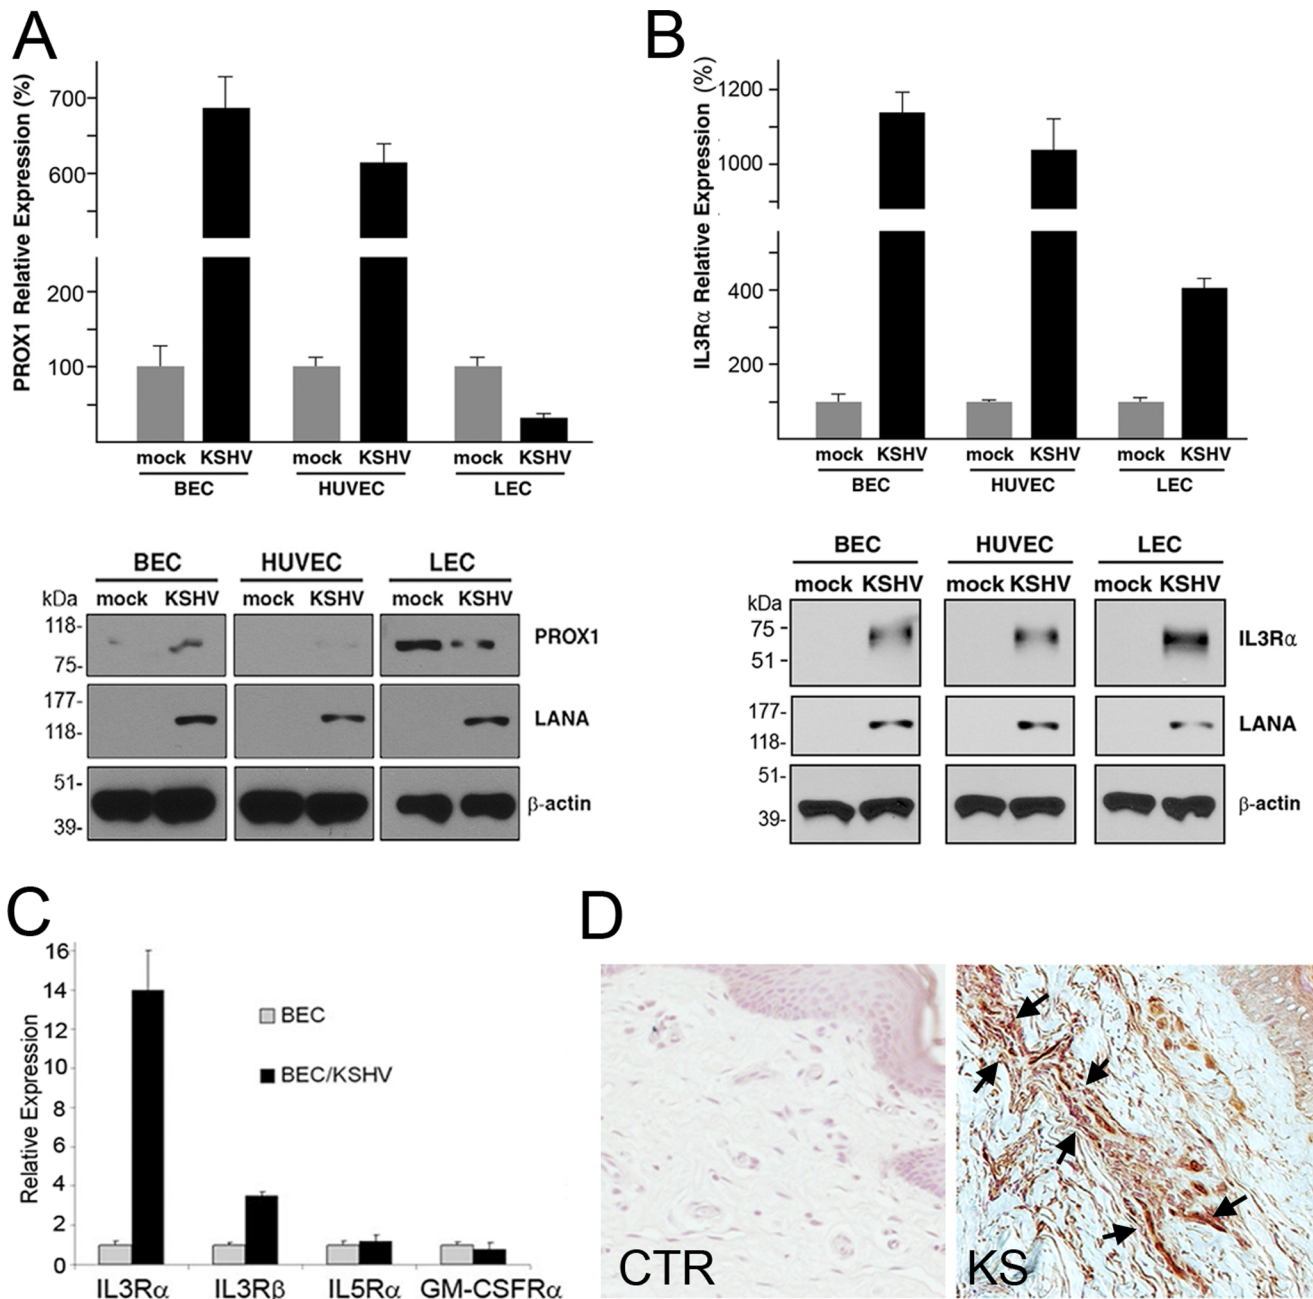

**Figure 1. Regulation of the expression of PROX1 and IL3R $\alpha$  by KSHV in blood vs. lymphatic-lineage endothelial cells.** (A) KSHV upregulated PROX1 in BECs and HUVECs, but downregulated PROX1 in LECs based on quantitative real-time RT-PCR (qRT-PCR) and western blot analyses. Latency-associated nuclear antigen (LANA) was used to confirm KSHV-infection and  $\beta$ -actin for equal loading in western analyses. (B) IL3R $\alpha$  was comparably upregulated by KSHV in the three cell types determined by qRT-PCR and western blot analyses. (C) Expression of IL3R $\beta$ , IL5R $\alpha$  and GM-CSFR $\alpha$  in BECs by KSHV infection was determined by qRT-PCR. (D) Immunohistochemistry analysis showed prominent expression of IL3R $\alpha$  in KS tumor cells (arrow-marked) in the skin of a HIV-positive patient. CTR, a control skin section from a normal neonatal foreskin; KS, Kaposi sarcoma tumor section from a HIV-positive individual. doi:10.1371/journal.ppat.1002770.g001

## Reference

1. Yoo J, Lee HN, Choi I, Choi D, Chung HK, et al. (2012) Opposing Regulation of PROX1 by Interleukin-3 Receptor and NOTCH Directs Differential Host Cell Fate Reprogramming by Kaposi Sarcoma Herpes Virus. *PLoS Pathog* 8(6): e1002770. doi:10.1371/journal.ppat.1002770
